# Supplementary material
Source: publisher site journal article supplement (https://www.dovepress.com/article/357797)
Supplement: Supplementary file 1 [file get_supplementary_file.php]

Supplementary table S1. Sensitivity analysis

|  | IL-6 | | | IL-10 | | |
| --- | --- | --- | --- | --- | --- | --- |
|  | Raw data | Imputation method 1 a | Imputation method 2 b | Raw data | Imputation method 1 a | Imputation method 2 b |
| Variable | Coef. (SE) | Coef. (SE) | Coef. (SE) | Coef. (SE) | Coef. (SE) | Coef. (SE) |
| PTSD | 1.20 (1.08) | 1.20 (0.70) | 1.13 (0.69) | 1.62 (3.18) | 1.62 (0.78) | 1.42 (0.82) |
| Intercept | 5.67 (2.33) | 5.68 (2.23) | 8.61 (2.15) | 22.75 (11.85) | 22.77 (11.56) | 35.13 (11.30) |
| Notes: a Zero values replaced with LLOD at each time point. b Zero values replaced with 1 % of mean value at each time point. Coefficients (SE) are computed with mixed model analysis (main effects). | | | | | | |
|  |

| Supplementary table S2. Multilevel models with main effects and interaction with time for the cytokines and BDI-II as dependent variables. Patients not using anti-inflammatory drugs |
| --- |
|  |

|  | IL-6 | | |  | IL-10 | | |  | BDI-II | | |  |
| --- | --- | --- | --- | --- | --- | --- | --- | --- | --- | --- | --- | --- |
|  | Main effect of PTSD |  | With interaction term |  | Main effect of PTSD |  | With interaction term |  | Main effect of PTSD |  | With interaction term |  |
|  |  |  |  |  |  |  |
| Variable | Coef. (SE) | P-value | Coef. (SE) | P-value | Coef. (SE) | P-value | Coef. (SE) | P-value | Coef. (SE) | P-value | Coef. (SE) | P-value |
| PTSD a | 1.20 (0.87) | 0.170 | 4.21 (6.05) | 0.487 | 1.96 (1.02) | 0.054 | 39.61 (29.30) | 0.181 | 3.94 (2.38) | 0.098 | 3.68 (2.54) | 0.146 |
| Time | -0.11 (0.05) | **0.035** | -0.08 (0.06) | 0.167 | -0.48 (0.25) | 0.060 | -0.22 (0.32) | 0.487 | -0.08 (0.03) | **0.007** | -0.08 (0.036) | **0.025** |
| Intercept | 6.67 (2.71) | **0.014** | 5.53 (3.31) | 0.094 | 27.01 (14.15) | 0.056 | 12.75 (18.03) | 0.482 | 23.98 (1.61) | **<0.001** | 24.08 (1.61) | <0.001 |
| PTSD x time |  |  | -0.06 (0.11) | 0.593 |  |  | -0.67 (0.52) | 0.196 |  |  | 0.013 (0.06) | 0.815 |
| Notes: a PTSD = Post-traumatic stress disorder. 66 patients did not use any anti-inflammatory drugs. Significant p-values in boldface. | | | | | | | | | | | | |

| Supplementary table S3. Multilevel models with main effects and interaction with time for the cytokines and BDI-II as dependent variables. Patients using anti-inflammatory drugs |
| --- |
|  |

|  | IL-6 | | |  | IL-10 | | |  | BDI-II | | |  |
| --- | --- | --- | --- | --- | --- | --- | --- | --- | --- | --- | --- | --- |
|  | Main effect of PTSD |  | With interaction term |  | Main effect of PTSD |  | With interaction term |  | Main effect of PTSD |  | With interaction term |  |
|  |  |  |  |  |  |  |
| Variable | Coef. (SE) | P-value | Coef. (SE) | P-value | Coef. (SE) | P-value | Coef. (SE) | P-value | Coef. (SE) | P-value | Coef. (SE) | P-value |
| PTSD a | 1.74 (0.70) | **0.014** | 2.14 (1.19) | 0.071 | 1.42 (0.52) | **0.007** | 6.59 (2.76) | **0.017** | 5.23 (5.35) | 0.329 | -0.81 (7.01) | 0.908 |
| Time | -0.02 (0.02) | 0.268 | -0.01 (0.001) | 0.244 | -0.07 (0.03) | **0.022** | -0.01 (0.01) | 0.171 | -0.10 0.07) | 0.151 | -0.24 (0.11) | **0.028** |
| Intercept | 1.01 (0.59) | 0.090 | 0.79 (0.50) | 0.113 | 3.56 (1.41) | **0.011** | 0.80 (0.37) | **0.030** | 23.50 (4.69) | <0.001 | 27.03 (5.65) | **<0.001** |
| PTSD x time |  |  | -0.01 (0.027) | 0.671 |  |  | -0.11 (0.05) | **0.024** |  |  | 0.26 (0.13) | **0.048** |
| Notes: a PTSD = Post-traumatic stress disorder. 15 patients used anti-inflammatory drugs during the main treatment stay. Of these were seven non-PTSD patients, while eight were diagnosed with PTSD. Significant p-values in boldface. | | | | | | | | | | | | |
|  |
